# Supplementary material for: Marine Brown Algae-Derived Compounds as Potential Inhibitors of Japanese Encephalitis Virus RNA-Dependent RNA Polymerase
Source: MDPI journal article supplement (doi:10.3390/md22020092), 2024-02-17
Supplement: s1 [file s1]

**Table S1.** Virtual screening results of the top 154 marine fungi compounds

| S.N. | Compounds  | docking score | S.N. | Compounds  | docking score |
|------|------------|---------------|------|------------|---------------|
| 1.   | CMNPD16749 | -15.7         | 78.  | CMNPD5356  | -7.8          |
| 2.   | CMNPD2606  | -15.2         | 79.  | CMNPD5376  | -7.8          |
| 3.   | CMNPD27817 | -14.8         | 80.  | CMNPD5363  | -7.8          |
| 4.   | CMNPD23662 | -14.2         | 81.  | CMNPD4683  | -7.8          |
| 5.   | CMNPD14869 | -11.6         | 82.  | CMNPD14030 | -7.8          |
| 6.   | CMNPD14874 | -11.5         | 83.  | CMNPD21107 | -7.8          |
| 7.   | CMNPD4727  | -10.5         | 84.  | CMNPD536   | -7.8          |
| 8.   | CMNPD4727  | -10.3         | 85.  | CMNPD7318  | -7.8          |
| 9.   | CMNPD2215  | -10.3         | 86.  | CMNPD5903  | -7.7          |
| 10.  | CMNPD2215  | -10.1         | 87.  | CMNPD5916  | -7.7          |
| 11.  | CMNPD2209  | -10.1         | 88.  | CMNPD6595  | -7.7          |
| 12.  | CMNPD2214  | -10           | 89.  | CMNPD533   | -7.7          |
| 13.  | CMNPD13351 | -10           | 90.  | CMNPD1801  | -7.7          |
| 14.  | CMNPD30999 | -9.7          | 91.  | CMNPD535   | -7.7          |
| 15.  | CMNPD31000 | -9.5          | 92.  | CMNPD535   | -7.7          |
| 16.  | CMNPD30998 | -9.5          | 93.  | CMNPD27816 | -7.6          |
| 17.  | CMNPD2605  | -9.5          | 94.  | CMNPD455   | -7.6          |
| 18.  | CMNPD2208  | -9.4          | 95.  | CMNPD23659 | -7.6          |
| 19.  | CMNPD2214  | -9.4          | 96.  | CMNPD23663 | -7.6          |
| 20.  | CMNPD2212  | -9.2          | 97.  | CMNPD5910  | -7.6          |
| 21.  | CMNPD2212  | -8.8          | 98.  | CMNPD26461 | -7.6          |
| 22.  | CMNPD2609  | -8.8          | 99.  | CMNPD533   | -7.6          |
| 23.  | CMNPD8816  | -8.7          | 100. | CMNPD5355  | -7.6          |
| 24.  | CMNPD2213  | -8.7          | 101. | CMNPD13329 | -7.6          |
| 25.  | CMNPD23665 | -8.7          | 102. | CMNPD3155  | -7.5          |
| 26.  | CMNPD11763 | -8.7          | 103. | CMNPD416   | -7.5          |
| 27.  | CMNPD8048  | -8.6          | 104. | CMNPD27811 | -7.5          |
| 28.  | CMNPD5368  | -8.6          | 105. | CMNPD27811 | -7.5          |
| 29.  | CMNPD436   | -8.6          | 106. | CMNPD5372  | -7.4          |
| 30.  | CMNPD3177  | -8.5          | 107. | CMNPD489   | -7.4          |
| 31.  | CMNPD8046  | -8.5          | 108. | CMNPD22333 | -7.4          |
| 32.  | CMNPD5916  | -8.5          | 109. | CMNPD18931 | -7.4          |
| 33.  | CMNPD5918  | -8.4          | 110. | CMNPD27816 | -7.4          |
| 34.  | CMNPD8815  | -8.4          | 111. | CMNPD5908  | -7.4          |
| 35.  | CMNPD4706  | -8.4          | 112. | CMNPD9492  | -7.4          |
| 36.  | CMNPD18937 | -8.4          | 113. | CMNPD7317  | -7.4          |
| 37.  | CMNPD1813  | -8.4          | 114. | CMNPD17788 | -7.3          |
| 38.  | CMNPD13326 | -8.4          | 115. | CMNPD23659 | -7.3          |
| 39.  | CMNPD5920  | -8.3          | 116. | CMNPD5355  | -7.3          |
| 40.  | CMNPD5918  | -8.3          | 117. | CMNPD5355  | -7.3          |
| 41.  | CMNPD5923  | -8.3          | 118. | CMNPD5356  | -7.3          |
| 42.  | CMNPD2218  | -8.3          | 119. | CMNPD18936 | -7.3          |
| 43.  | CMNPD447   | -8.3          | 120. | CMNPD22332 | -7.3          |
| 44.  | CMNPD17789 | -8.3          | 121. | CMNPD3175  | -7.3          |
| 45.  | CMNPD5920  | -8.3          | 122. | CMNPD5355  | -7.3          |
| 46.  | CMNPD5919  | -8.2          | 123. | CMNPD5355  | -7.3          |
| 47.  | CMNPD5918  | -8.2          | 124. | CMNPD27817 | -7.2          |
| 48.  | CMNPD18924 | -8.2          | 125. | CMNPD1846  | -7.2          |
| 49.  | CMNPD1803  | -8.2          | 126. | CMNPD17789 | -7.2          |
| 50.  | CMNPD5918  | -8.2          | 127. | CMNPD5355  | -7.2          |
| 51.  | CMNPD5911  | -8.2          | 128. | CMNPD22356 | -7.2          |
| 52.  | CMNPD6604  | -8.1          | 129. | CMNPD17772 | -7.2          |
| 53.  | CMNPD5918  | -8.1          | 130. | CMNPD1846  | -7.2          |
| 54.  | CMNPD5916  | -8.1          | 131. | CMNPD5356  | -7.2          |
| 55.  | CMNPD5919  | -8.1          | 132. | CMNPD5908  | -7.2          |
| 56.  | CMNPD14846 | -8.1          | 133. | CMNPD5908  | -7.2          |
| 57.  | CMNPD4719  | -8            | 134. | CMNPD5355  | -7.1          |
| 58.  | CMNPD5920  | -8            | 135. | CMNPD18933 | -7.1          |
| 59.  | CMNPD5362  | -8            | 136. | CMNPD18936 | -7.1          |
| 60.  | CMNPD5377  | -8            | 137. | CMNPD5356  | -7.1          |
| 61.  | CMNPD5923  | -8            | 138. | CMNPD10217 | -7.1          |
| 62.  | CMNPD5369  | -8            | 139. | CMNPD23657 | -7            |

|     |            |      |      |            |      |
|-----|------------|------|------|------------|------|
| 63. | CMNPD2227  | -8   | 140. | CMNPD22331 | -7   |
| 64. | CMNPD4717  | -8   | 141. | CMNPD17771 | -7   |
| 65. | CMNPD17804 | -8   | 142. | CMNPD14006 | -7   |
| 66. | CMNPD5921  | -8   | 143. | CMNPD5356  | -7   |
| 67. | CMNPD224   | -8   | 144. | CMNPD5355  | -6.9 |
| 68. | CMNPD5375  | -8   | 145. | CMNPD7317  | -6.9 |
| 69. | CMNPD5919  | -8   | 146. | CMNPD5902  | -6.9 |
| 70. | CMNPD5362  | -7.9 | 147. | CMNPD17769 | -6.7 |
| 71. | CMNPD5356  | -7.9 | 148. | CMNPD5356  | -6.7 |
| 72. | CMNPD4685  | -7.9 | 149. | CMNPD14006 | -6.6 |
| 73. | CMNPD5919  | -7.9 | 150. | CMNPD19967 | -6.6 |
| 74. | CMNPD5376  | -7.9 | 151. | CMNPD9491  | -6.5 |
| 75. | CMNPD5919  | -7.9 | 152. | CMNPD17770 | -6.4 |
| 76. | CMNPD2596  | -7.9 | 153. | CMNPD5373  | -6.3 |
| 77. | CMNPD533   | -7.9 | 154. | -          | -    |

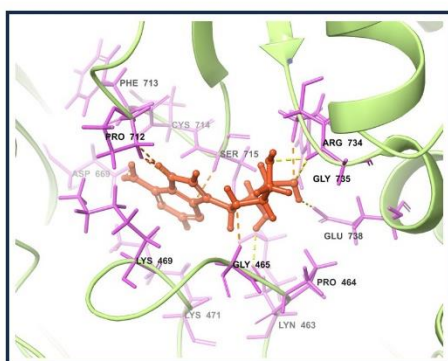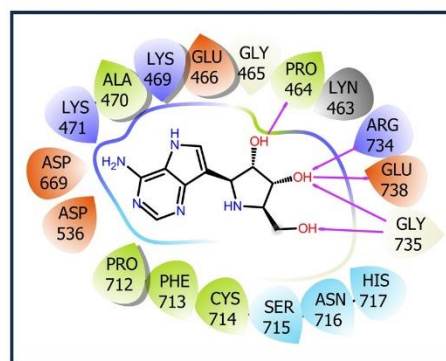

Supplementary Figure S1- 3D and 2D interaction diagram of protein ligand interaction of JEV-RdRp with Genidesivir as reference molecule.

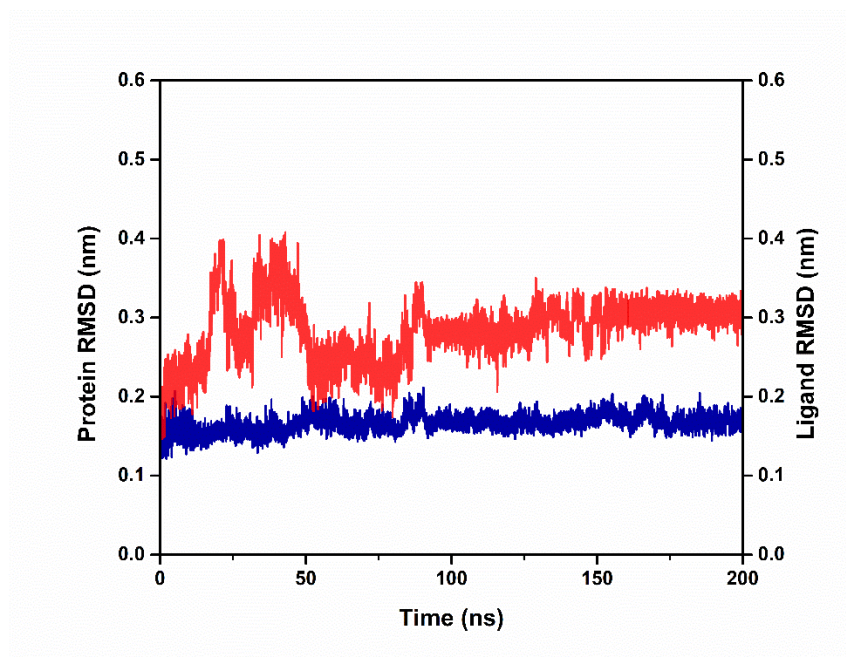

Supplementary Figure S2- RMSD value resulting from JEV-RdRp docked with Genidesivir as reference molecule during molecular dynamics simulation over 200 ns.

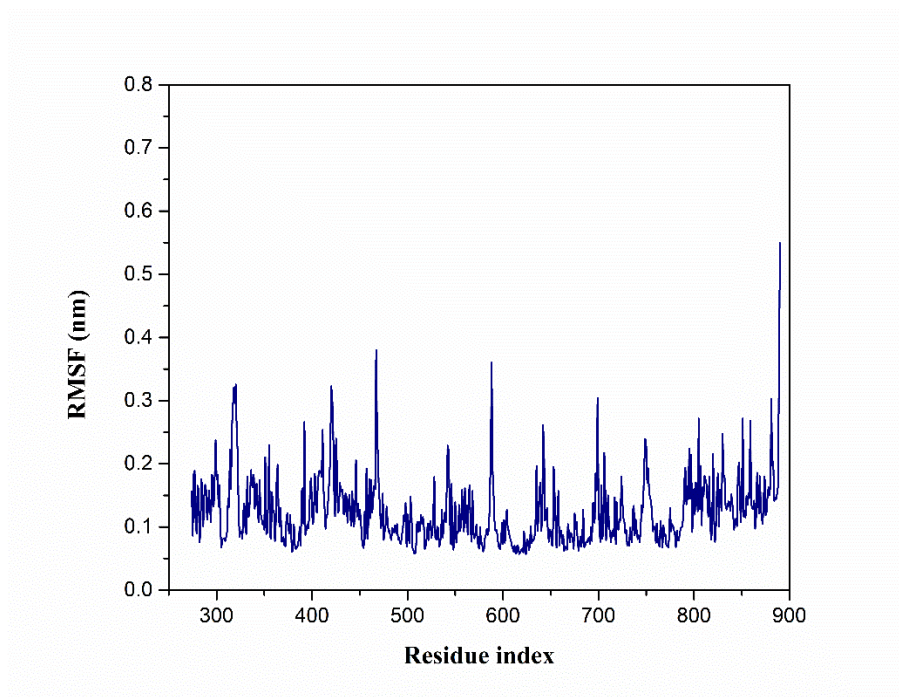

Supplementary Figure S3- The protein root mean square fluctuation (P-RMSF) of JEV-RdRp, docked with Genidesivir as reference molecule during 200ns simulation.

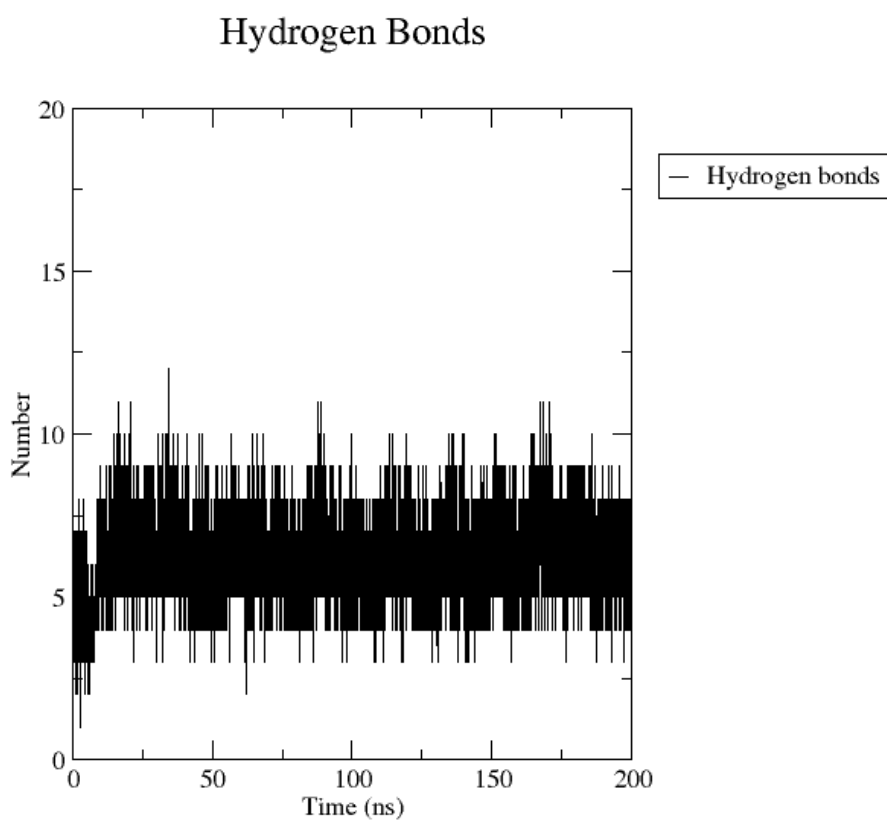

Supplementary Figure S4- Number of hydrogen bonds present in JEV-RdRp docked with Genidesivir as reference molecule during 200ns simulation.

Table S2- MM-PBSA Free Energy Components for selected compounds.

| Energy component/<br>Complexes | JEV-<br>RdRp_CM<br>NPD16749 | JEV-<br>RdRp_CMN<br>PD2606 | JEV-<br>RdRp_CMN<br>PD27817 | JEV-<br>RdRp_CMN<br>PD23662 | JEV-<br>RdRp_Galidesivir |
|--------------------------------|-----------------------------|----------------------------|-----------------------------|-----------------------------|--------------------------|
| $\Delta$ VDWAALS               | -35.79                      | -47.3719                   | -54.76                      | -36.67                      | -39.04                   |
| $\Delta$ EEL                   | -322.4                      | -18.0373                   | -23.26                      | -32.82                      | -37.17                   |
| $\Delta$ EGB                   | 302.4                       | 37.2955                    | 49.92                       | 51.46                       | 49.50                    |
| $\Delta$ ESURF                 | -7.65                       | -5.3397                    | -8.43                       | -5.51                       | -6.35                    |

|                |         |          |        |        |        |
|----------------|---------|----------|--------|--------|--------|
| $\Delta$ GAS   | -358.18 | -65.4092 | -78.02 | -69.49 | -76.21 |
| $\Delta$ GSOLV | 294.75  | 31.9557  | 41.49  | 45.95  | 43.15  |
| $\Delta$ TOTAL | -63.43  | -33.4534 | -36.53 | -23.54 | -33.06 |

2D projection of trajectory

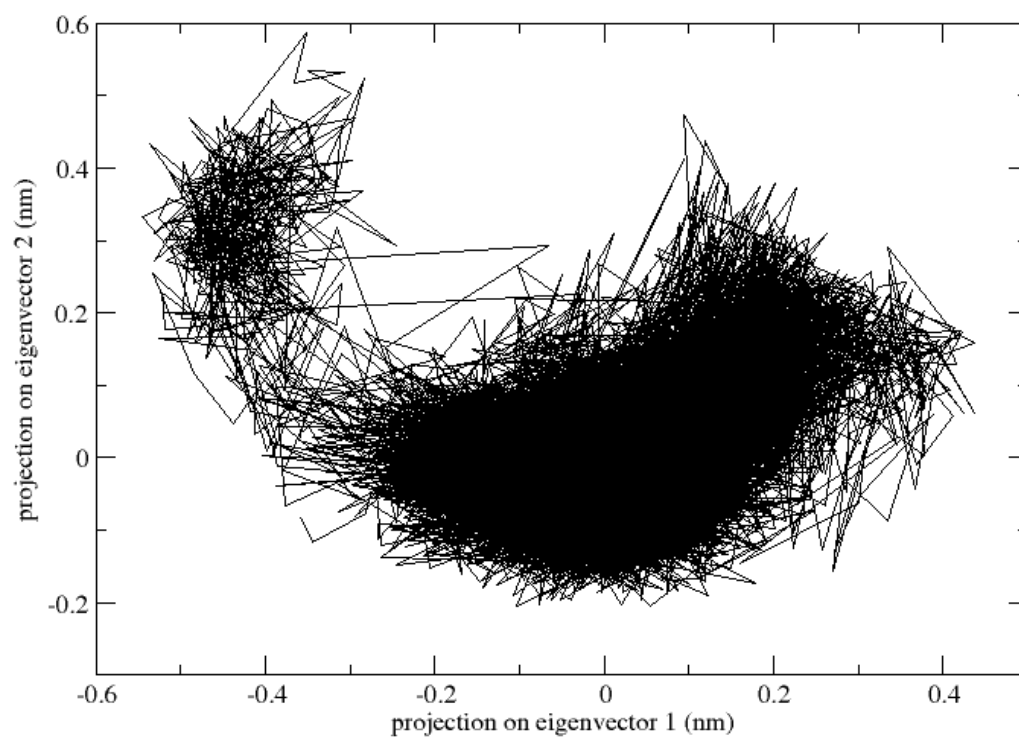

Supplementary Figure S5- Scatter plot of JEV-RdRp docked with Genidesivir as reference molecule during 200ns simulation

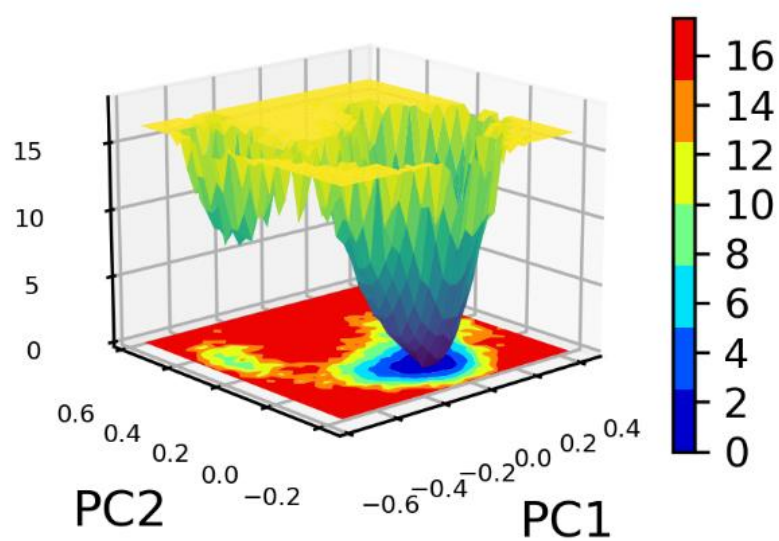

Supplementary Figure S6- The free energy landscape of JEV-RdRp docked with Genidesivir as reference molecule.
